# Supplementary material for: Nanocomposite microstructures with tunable mechanical and chemical properties
Source: Royal Society of Chemistry journal article supplement (doi:10.1039/c000304m), 2010-01-01
Supplement: c000304m.pdf [file c000304m.pdf]

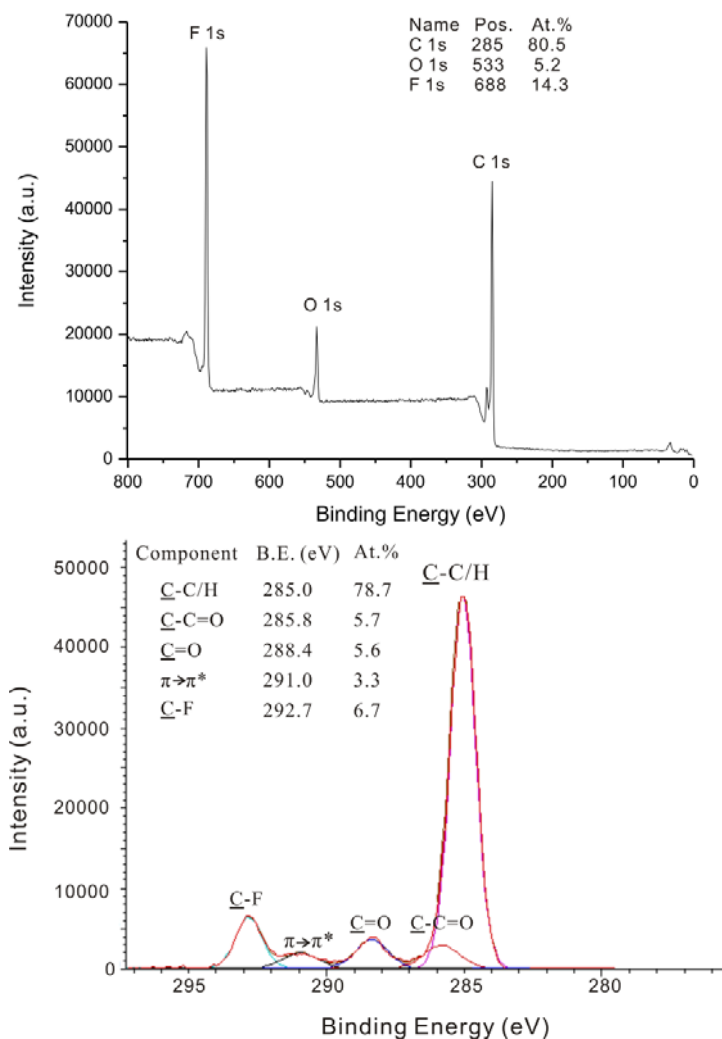

Note that the atom compositions in the high-resolution peak fitting results are different from the data reported in Fig. 3, which are total percent, i.e., percent of a given carbon species multiplied by the total amount of carbon (e.g.,  $78.7 * 80.5$  for C-C/H). Quantification results were generated by the software CasaXPS.
